# Supplementary material for: Ultra-Processed Food vs. Fruit and Vegetable Consumption before and during the COVID-19 Pandemic among Greek and Swedish Students
Source: MDPI journal article supplement (doi:10.3390/nu15102321), 2023-05-16
Supplement: s1 [file s1]

# Supplementary material 2.

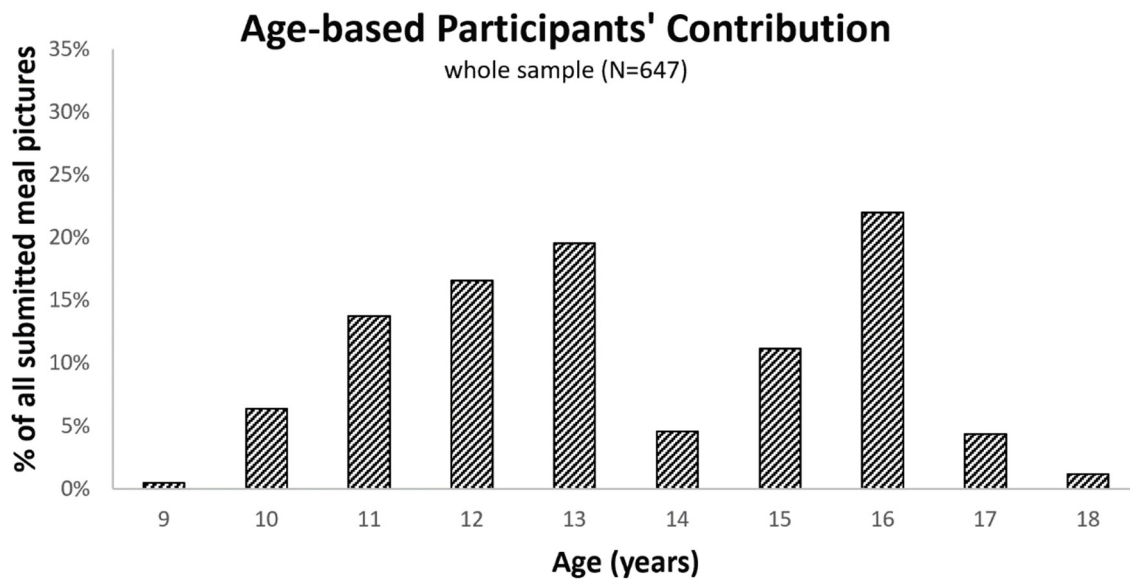

**Figure S1:** Contribution of data per age of the participant across the whole dataset (GR and SWE)

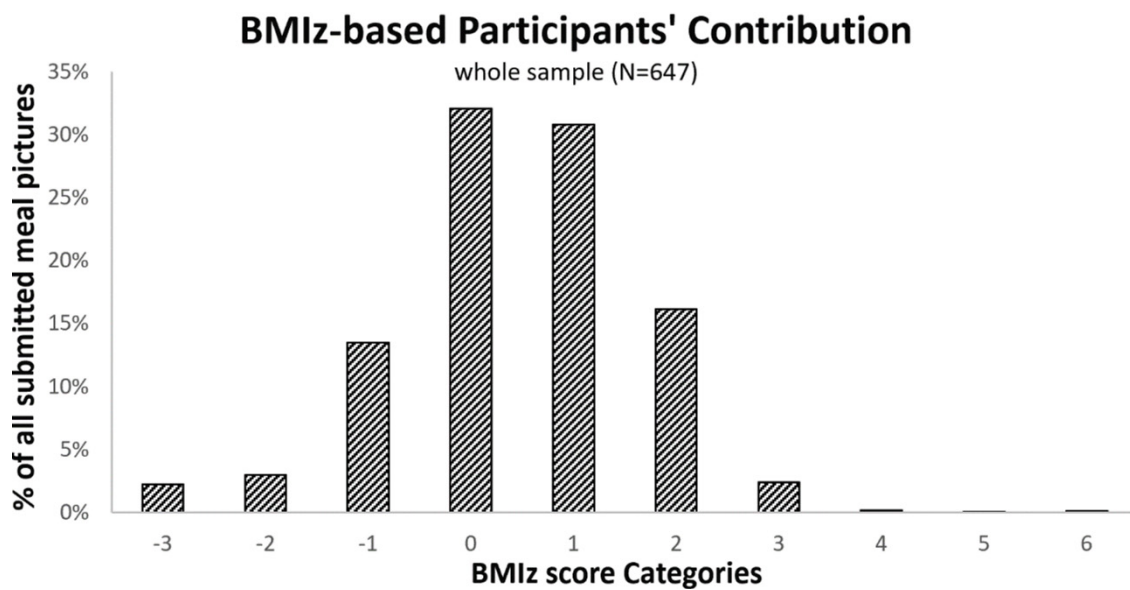

**Figure S2:** Contribution of data per age of the participant across the whole dataset (GR and SWE); Interpretation of cut-offs based on WHO<sup>1</sup>: Severe thinness: below -2, Thinness: from -2 to -1, Normal weight: -1 to 1, Overweight: 1 to 2; Obesity: more than 2.

## References

1. "Growth Reference 5-19 Years - BMI-for-Age (5-19 Years)." *World Health Organization*, [www.who.int/tools/growth-reference-data-for-5to19-years/indicators/bmi-for-age](http://www.who.int/tools/growth-reference-data-for-5to19-years/indicators/bmi-for-age). Accessed 3 May 2023.
